# Supplementary material for: Prediction of Anticancer Peptides Using a Low-Dimensional Feature Model
Source: Front Bioeng Biotechnol. 2020 Aug 12;8:892. doi: 10.3389/fbioe.2020.00892 (PMC7434836; doi:10.3389/fbioe.2020.00892)
Supplement: Supplementary file 2 [file Table_1.XLSX]

## Sheet: Sheet1
Methods	Sn	Sp	Acc	MCC	F-score
iACP	0.884	0.9902	0.9477	0.893
Hajisharifi et al.	0.8518	0.9268	0.897	0.784
SAP	0.8623	0.9563	0.9186	0.8301	0.8947
Our method（RF）	0.862	0.971	0.9273	0.849	0.927
Our method（LibD3C）	0.855	0.966	0.9215	0.837	0.921
Our method（SVM）	0.877	0.961	0.9273	0.848	0.927
